# Supplementary material
Source: publisher figshare collection journal article supplement (https://asha.figshare.com/articles/dataset/_/27162564)
Supplement: Supplementary file 1 [file 1]

**Supplemental Material S3. Key word search in Scopus.**

| Step | Search query                                                                                                                                                                                                                                                                                                                                                                                                                                                                                                                                                                                                                                                                                                                                                                                                                                                                                                                                                                                                                                                                                                                                                                                                          | Result    |
|------|-----------------------------------------------------------------------------------------------------------------------------------------------------------------------------------------------------------------------------------------------------------------------------------------------------------------------------------------------------------------------------------------------------------------------------------------------------------------------------------------------------------------------------------------------------------------------------------------------------------------------------------------------------------------------------------------------------------------------------------------------------------------------------------------------------------------------------------------------------------------------------------------------------------------------------------------------------------------------------------------------------------------------------------------------------------------------------------------------------------------------------------------------------------------------------------------------------------------------|-----------|
| #1   | TITLE-ABS-KEY("artificial intelligen*" OR "machine intelligen*" OR "machine learning" OR "data learning" OR "neural network" OR "support vector*" OR "k-nearest neighbor*" OR "markov decision" OR "markov chain" OR "markov random field" OR "natural language process" OR "deep learn*" OR "big data" OR "fuzzy" OR "cluster*" OR "classifier" OR "classification algorithm" OR "automatic" OR "autonomous" OR "automated" OR "computational intelligence" OR "computer vision" OR "intelligent comput*" OR "robot*" OR "intelligent tutor*" OR "intelligent agent*" OR "intelligent system*" OR "expert system*" OR "voice recognition" OR "speech recognition")                                                                                                                                                                                                                                                                                                                                                                                                                                                                                                                                                   | 5,927,021 |
| #2   | TITLE-ABS-KEY("speech* patholog*" OR "communication disorder*" OR "speech* disorder*" OR "language disorder*" OR "speech* impair*" OR "speech* therap*" OR "speech* assess*" OR "pathological speech" OR "pathological language" OR "stutter*" OR "dysarthria" OR "swallow* disorder*" OR "voic* disorder*" OR "aphasia" OR "speech apraxia" OR ("autis*" AND ("speech" OR "language"))) OR ("schizophreni*" AND ("speech" OR "language"))) OR ("brain injur*" AND ("speech" OR "language"))) OR ("dement*" AND ("speech" OR "language")))                                                                                                                                                                                                                                                                                                                                                                                                                                                                                                                                                                                                                                                                            | 173,745   |
| #3   | (TITLE-ABS-KEY("artificial intelligen*" OR "machine intelligen*" OR "machine learning" OR "data learning" OR "neural network" OR "support vector*" OR "k-nearest neighbor*" OR "markov decision" OR "markov chain" OR "markov random field" OR "natural language process" OR "deep learn*" OR "big data" OR "fuzzy" OR "cluster*" OR "classifier" OR "classification algorithm" OR "automatic" OR "autonomous" OR "automated" OR "computational intelligence" OR "computer vision" OR "intelligent comput*" OR "robot*" OR "intelligent tutor*" OR "intelligent agent*" OR "intelligent system*" OR "expert system*" OR "voice recognition" OR "speech recognition")) AND (TITLE-ABS-KEY("speech* patholog*" OR "communication disorder*" OR "speech* disorder*" OR "language disorder*" OR "speech* impair*" OR "speech* therap*" OR "speech* assess*" OR "pathological speech" OR "pathological language" OR "stutter*" OR "dysarthria" OR "swallow* disorder*" OR "voic* disorder*" OR "aphasia" OR "speech apraxia" OR ("autis*" AND ("speech" OR "language"))) OR ("schizophreni*" AND ("speech" OR "language"))) OR ("brain injur*" AND ("speech" OR "language"))) OR ("dement*" AND ("speech" OR "language"))) | 10,298    |

- |    |                                                                                                                                                                                                                                                                                                                                                                                                                                                                                                                                                                                                                                                                                                                                                                                                                                                                                                                                                                                                                                                                                                                                                                                                                                                                                                                                                                                                                     |       |
|----|---------------------------------------------------------------------------------------------------------------------------------------------------------------------------------------------------------------------------------------------------------------------------------------------------------------------------------------------------------------------------------------------------------------------------------------------------------------------------------------------------------------------------------------------------------------------------------------------------------------------------------------------------------------------------------------------------------------------------------------------------------------------------------------------------------------------------------------------------------------------------------------------------------------------------------------------------------------------------------------------------------------------------------------------------------------------------------------------------------------------------------------------------------------------------------------------------------------------------------------------------------------------------------------------------------------------------------------------------------------------------------------------------------------------|-------|
| #4 | <p>(TITLE-ABS-KEY("artificial intelligen*" OR "machine intelligen*" OR "machine learning" OR "data learning" OR "neural network" OR "support vector*" OR "k-nearest neighbor*" OR "markov decision" OR "markov chain" OR "markov random field" OR "natural language process" OR "deep learn*" OR "big data" OR "fuzzy" OR "cluster*" OR "classifier" OR "classification algorithm" OR "automatic" OR "autonomous" OR "automated" OR "computational intelligence" OR "computer vision" OR "intelligent comput*" OR "robot*" OR "intelligent tutor*" OR "intelligent agent*" OR "intelligent system*" OR "expert system*" OR "voice recognition" OR "speech recognition")) AND (TITLE-ABS-KEY("speech* patholog*" OR "communication disorder*" OR "speech* disorder*" OR "language disorder*" OR "speech* impair*" OR "speech* therap*" OR "speech* assess*" OR "pathological speech" OR "pathological language" OR "stutter*" OR "dysarthria" OR "swallow* disorder*" OR "voic* disorder*" OR "aphasia" OR "speech apraxia" OR ("autis*" AND ("speech" OR "language")) OR ("schizophreni*" AND ("speech" OR "language")) OR ("brain injur*" AND ("speech" OR "language")) OR ("dement*" AND ("speech" OR "language")))) AND (EXCLUDE(DOCTYPE, "cr") OR EXCLUDE(DOCTYPE, "ch") OR EXCLUDE(DOCTYPE, "no") OR EXCLUDE(DOCTYPE, "le") OR EXCLUDE(DOCTYPE, "bk") OR EXCLUDE(DOCTYPE, "er") OR EXCLUDE(DOCTYPE, "tb"))</p> | 9,694 |
| #5 | <p>(TITLE-ABS-KEY("artificial intelligen*" OR "machine intelligen*" OR "machine learning" OR "data learning" OR "neural network" OR "support vector*" OR "k-nearest neighbor*" OR "markov decision" OR "markov chain" OR "markov random field" OR "natural language process" OR "deep learn*" OR "big data" OR "fuzzy" OR "cluster*" OR "classifier" OR "classification algorithm" OR "automatic" OR "autonomous" OR "automated" OR "computational intelligence" OR "computer vision" OR "intelligent comput*" OR "robot*" OR "intelligent tutor*" OR "intelligent agent*" OR "intelligent system*" OR "expert system*" OR "voice recognition" OR "speech recognition")) AND (TITLE-ABS-KEY("speech* patholog*" OR "communication disorder*" OR "speech* disorder*" OR "language disorder*" OR "speech* impair*" OR "speech* therap*" OR "speech* assess*" OR "pathological speech" OR "pathological language" OR "stutter*" OR "dysarthria" OR "swallow* disorder*" OR "voic* disorder*" OR "aphasia" OR "speech apraxia" OR ("autis*" AND ("speech" OR "language")) OR ("schizophreni*" AND ("speech" OR "language")) OR ("brain injur*" AND ("speech" OR "language")) OR ("dement*" AND ("speech" OR "language")))) AND (EXCLUDE(DOCTYPE,</p>                                                                                                                                                                    | 9,324 |

|    |                                                                                                                                                                                                                                                                                                                                                                                                                                                                                                                                                                                                                                                                                                                                                                                                                                                                                                                                                                                                                                                                                                                                                                                                                                                                                                                                                                                                                                                                                                                                                                                                                                                                                                                            |       |
|----|----------------------------------------------------------------------------------------------------------------------------------------------------------------------------------------------------------------------------------------------------------------------------------------------------------------------------------------------------------------------------------------------------------------------------------------------------------------------------------------------------------------------------------------------------------------------------------------------------------------------------------------------------------------------------------------------------------------------------------------------------------------------------------------------------------------------------------------------------------------------------------------------------------------------------------------------------------------------------------------------------------------------------------------------------------------------------------------------------------------------------------------------------------------------------------------------------------------------------------------------------------------------------------------------------------------------------------------------------------------------------------------------------------------------------------------------------------------------------------------------------------------------------------------------------------------------------------------------------------------------------------------------------------------------------------------------------------------------------|-------|
| #6 | <p>"cr") OR (EXCLUDE(DOCTYPE, "ch") OR EXCLUDE(DOCTYPE, "no") OR EXCLUDE(DOCTYPE, "le") OR EXCLUDE(DOCTYPE, "bk") OR EXCLUDE(DOCTYPE, "er") OR EXCLUDE(DOCTYPE, "tb")) AND (LIMIT-TO(LANGUAGE, "English"))</p> <p>(TITLE-ABS-KEY("artificial intelligen*" OR "machine intelligen*" OR "machine learning" OR "data learning" OR "neural network" OR "support vector*" OR "k-nearest neighbor*" OR "markov decision" OR "markov chain" OR "markov random field" OR "natural language process" OR "deep learn*" OR "big data" OR "fuzzy" OR "cluster*" OR "classifier" OR "classification algorithm" OR "automatic" OR "autonomous" OR "automated" OR "computational intelligence" OR "computer vision" OR "intelligent comput*" OR "robot*" OR "intelligent tutor*" OR "intelligent agent*" OR "intelligent system*" OR "expert system*" OR "voice recognition" OR "speech recognition")) AND (TITLE-ABS-KEY("speech* patholog*" OR "communication disorder*" OR "speech* disorder*" OR "language disorder*" OR "speech* impair*" OR "speech* therap*" OR "speech* assess*" OR "pathological speech" OR "pathological language" OR "stutter*" OR "dysarthria" OR "swallow* disorder*" OR "voic* disorder*" OR "aphasia" OR "speech apraxia" OR ("autis*" AND ("speech" OR "language")) OR ("schizophreni*" AND ("speech" OR "language")) OR ("brain injur*" AND ("speech" OR "language")) OR ("dement*" AND ("speech" OR "language")))) AND (EXCLUDE(DOCTYPE, "cr") OR (EXCLUDE(DOCTYPE, "ch") OR EXCLUDE(DOCTYPE, "no") OR EXCLUDE(DOCTYPE, "le") OR EXCLUDE(DOCTYPE, "bk") OR EXCLUDE(DOCTYPE, "er") OR EXCLUDE(DOCTYPE, "tb")) AND (LIMIT-TO(LANGUAGE, "English")) AND (EXCLUDE(PREFNAMEAUID, "Undefined#Undefined"))</p> | 9,324 |
|----|----------------------------------------------------------------------------------------------------------------------------------------------------------------------------------------------------------------------------------------------------------------------------------------------------------------------------------------------------------------------------------------------------------------------------------------------------------------------------------------------------------------------------------------------------------------------------------------------------------------------------------------------------------------------------------------------------------------------------------------------------------------------------------------------------------------------------------------------------------------------------------------------------------------------------------------------------------------------------------------------------------------------------------------------------------------------------------------------------------------------------------------------------------------------------------------------------------------------------------------------------------------------------------------------------------------------------------------------------------------------------------------------------------------------------------------------------------------------------------------------------------------------------------------------------------------------------------------------------------------------------------------------------------------------------------------------------------------------------|-------|

---
