# Supplementary material
Source: publisher figshare collection journal article supplement (https://asha.figshare.com/articles/dataset/_/27162564)
Supplement: Supplementary file 2 [file 1]

**Supplemental Material S2. Key word search in WoS.**

| Step | Search query                                                                                                                                                                                                                                                                                                                                                                                                                                                                                                                                                                                                                                              | Result    |
|------|-----------------------------------------------------------------------------------------------------------------------------------------------------------------------------------------------------------------------------------------------------------------------------------------------------------------------------------------------------------------------------------------------------------------------------------------------------------------------------------------------------------------------------------------------------------------------------------------------------------------------------------------------------------|-----------|
| #1   | TS=("artificial intelligen*" OR "machine intelligen*" OR "machine learning" OR "data learning" OR "neural network" OR "support vector*" OR "k-nearest neighbor*" OR "markov decision" OR "markov chain" OR "markov random field" OR "natural language process" OR "deep learn*" OR "big data" OR "fuzzy" OR "cluster*" OR "classifier" OR "classification algorithm" OR "automatic" OR "autonomous" OR "automated" OR "computational intelligence" OR "computer vision" OR "intelligent comput*" OR "robot*" OR "intelligent tutor*" OR "intelligent agent*" OR "intelligent system*" OR "expert system*" OR "voice recognition" OR "speech recognition") | 3,791,294 |
| #2   | TS=("speech* patholog*" OR "communication disorder*" OR "speech* disorder*" OR "language disorder*" OR "speech* impair*" OR "speech* therap*" OR "speech* assess*" OR "pathological speech" OR "pathological language" OR "stutter*" OR "dysarthria" OR "swallow* disorder*" OR "voic* disorder*" OR "aphasia" OR "speech apraxia" OR ("autis*" AND ("speech" OR "language"))) OR ("schizophre*" AND ("speech" OR "language")) OR ("brain injur*" AND ("speech" OR "language")) OR ("dement*" AND ("speech" OR "language")))                                                                                                                              | 84,644    |
| #3   | #2 AND #1                                                                                                                                                                                                                                                                                                                                                                                                                                                                                                                                                                                                                                                 | 5,870     |
| #4   | #2 AND #1 and Letters or Meeting Abstracts or Corrections or Notes or Books or Book Chapters (Exclude – Document Types)                                                                                                                                                                                                                                                                                                                                                                                                                                                                                                                                   | 5,810     |
| #5   | #2 AND #1 and Letters or Meeting Abstracts or Corrections or Notes or Books (Exclude – Document Types) and English (Languages)                                                                                                                                                                                                                                                                                                                                                                                                                                                                                                                            | 5,714     |
| #6   | AU=Anonymous                                                                                                                                                                                                                                                                                                                                                                                                                                                                                                                                                                                                                                              | 1,453,335 |
| #7   | #5 NOT #6                                                                                                                                                                                                                                                                                                                                                                                                                                                                                                                                                                                                                                                 | 5,711     |
