# Supplementary material
Source: publisher figshare collection journal article supplement (https://asha.figshare.com/articles/dataset/_/27162564)
Supplement: Supplementary file 3 [file 1]

**Supplemental Material S1.** Search query text.

| Research area                     | Query text                                                                                                                                                                                                                                                                                                                                                                                                                                                                                                                                                                                                                                           |
|-----------------------------------|------------------------------------------------------------------------------------------------------------------------------------------------------------------------------------------------------------------------------------------------------------------------------------------------------------------------------------------------------------------------------------------------------------------------------------------------------------------------------------------------------------------------------------------------------------------------------------------------------------------------------------------------------|
| (1) AI technologies               | “artificial intelligen*” OR “machine intelligen*” OR “machine learning” OR “data learning” OR “neural network” OR “support vector*” OR “k-nearest neighbor*” OR “markov decision” OR “markov chain” OR “markov random field” OR “natural language process” OR “deep learn*” OR “big data” OR “fuzzy” OR “cluster*” OR “classifier” OR “classification algorithm” OR “automatic” OR “autonomous” OR “automated” OR “computational intelligence” OR “computer vision” OR “intelligent comput*” OR “robot*” OR “intelligent tutor*” OR “intelligent agent*” OR “intelligent system*” OR “expert system*” OR “voice recognition” OR “speech recognition” |
| (2) Human communication disorders | “speech* patholog*” OR “communication disorder*” OR “speech* disorder*” OR “language disorder*” OR “speech* impair*” OR “speech* therap*” OR “speech* assess*” OR “pathological speech” OR “pathological language” OR “stutter*” OR “dysarthria” OR “swallow* disorder*” OR “voic* disorder*” OR “aphasia” OR “speech apraxia” OR (“autis*” AND (“speech” OR “language”)) OR (“schizophreni*” AND (“speech” OR “language”)) OR (“brain injur*” AND (“speech” OR “language”)) OR (“dement*” AND (“speech” OR “language”))                                                                                                                             |
